# Supplementary material for: OVOL2 impairs RHO GTPase signaling to restrain mitosis and aggressiveness of Anaplastic Thyroid Cancer
Source: J Exp Clin Cancer Res. 2022 Mar 25;41:108. doi: 10.1186/s13046-022-02316-2 (PMC8957195; doi:10.1186/s13046-022-02316-2)
Supplement: Supplementary file 2 — Additional file 2: [file 13046_2022_2316_MOESM2_ESM.xlsx]

## Sheet: S1
Expression primers					ChIP primers
target name	Forward primer	Reverse primer			target name	Forward primer	Reverse primer
OVOL2	CGCCAGATCGAAAATCAAGT	ACTTGAGGTGACGGTTCAGC			N-cadherin promoter (positive control)	CTGATGACAAATAGCGGGCC	CTCCCCAGCTCCTTGATCTC
CYPA	GACCCAACACAAATGGTTCC	TTTCACTTTCCCAAA			negative control	TCTCAAGGTGCCTGTCTGC	TGAAGTTTGGCCTCTGGTCT
Twist1	GGAGTCCGCAGTCTTACGAG	TCTGGAGGACCTGGTAGAGG			RHOJ promoter	GCAGCGGATGAAACAGGAAG	GTACTTCTGGGGAACGATGC
Twist2	AGAGCGACGAGATGGACAAT	CTAGTGGGAGGCGGACATG			RHOU promoter	GTCACCCTCTTGGGAGCTG	GAGGACCTGGAACACACGTT
Zeb1	TGCACTGTGTGTGGAAAGC	TTGCAGTTTGGGCATGCATA
Zeb2	CCTGCCCTCTCTGTAGCTAC	ACTTGCGATTACCTGCTCCT
Vimentin	AGCCTCAGAGAGGTCAGCAA	AAAGTGTGGCTGCCAAGAAC
β-catenin	TCCTAGCTCGGGATGTTCAC	CTTCTGCAGCTTCCTTGTCC
N-cadherin	GGTGGAGGAGAAGAAGACCAG	GGCATCAGGCTCCACAGT
MMP1	CATGACTTTCCTGGAATTGG	CCTGCAGTTGAACCAGCTAT
MMP2	ATAACCTGGATGCCGTCGT	AGGCACCCTTGAAGAAGTAGC
MMP3	GACCTGGAAATGTTTTGGCCC	GGCCAATTTCATGAGCAGCA
NCAM1	CGACGAGGCTGAGTACATCT	CGGAGGCTTCACAGGTAAGA
ZO3	GCATCATTCCCAACCAGAGC	AGTGGTCTTCTTGGCTCCTC
CLDN3	GTCGGCCAACACCATTATCC	CGTGTACTTCTTCTCGCGTG
OCLN	ACATTTATGATGAGCAGCCCC	ATGCCATGGGACTGTCAACT
EpCam	CTGGCCGTAAACTGCTTTGT	CCCCTTCAGGTTTTGCTCTT
E-cadherin	TGCCCAGAAAATGAAAAAGG	GTGTATGTGGCAATGCGTTC
CDH16	TGCAGAGCTGTCTGTGGAAG	CCCCTGACAGCACGATCT
CycE2	TGCAGAGCTGTTGGATCTCTGTG	GGCCGAAGCAGCAAGTATACC
CycA2	AGCTGGCCTGAATCATTAATACG	GGTGAAGGTCCATGAGACAAGG
CycB1	TCCATTATTGATCGGTTCATGC	TCAGTCACAAAAGCAAAGTCACC
CDK1	GGCTCTTGGAAATTGAGCGG	GGTATGGTAGATCCCGGCTT
RHOU	GCCCCTCATCCTTCCAGAAC	GAGATCCGACTGCGTTCCAA
RHOJ	TTACTGTGACTGTGGGAGGC	AAGAGGCAGGGTTTACGACA
RAD51C	GGAGTGCCCTTAATGAAAACAAC	AAAACTGCTTCACCTGCCAC
CEP135	TGTTGGAGAAAGAGAGCAAAGC	CCGGTTCATCAATTTGCATACG
SYDE1	GCCCCTCATCATCCAGAAGT	CTTTCTTCACTGCCGCTGAG
TUBB4A	AATTATGTCCCCAGAGCGGT	CCCCTTTGCCCAGTTGTTG
EPHA5	GATGTGTGTGTTCAGCCAGG	AGGGCAGAAAACATCCAGGT
SOS2	TTCACCTAGACGTCGACCTG	CTTTGCCTTCCCATCCATCG
ACTR1A	AAGGCGACATCTTCATTGGC	AATCCTTGACGATGCCATGC
SDCBP	TGCTCCTATCCCTCACGATG	AGAAACCACGGCCACATTTG
ARPC1B	GGAACAAGGACCGCACCC	TTTGGCACCGCTCTTTTCAT
SKP2	CGTATTTTAAACTCCCGGGCC	CGTTGCTACTCAGGTCTGGA
ARHGAP31	ACGTTTTGAAGAGCTGTGCA	TCTGGACATTGATCTGAGCCA
ARHGEF2	GCGATGCCCTGTACTTGAGT	CGATGGACAGAGCGAGTAGT
CENPT	GGTGACAGAAGCAGAGGGAT	GAGAGACTCAGGGGTGCTG
STARD8	CTCTCGGCTCACACACATCT	CGGATCTTTGCCACTTCCAT
HAUS1	CAGGAGGAGAGAGAAACGCA	GACCCTGTTGCGTTCTGAAA
CHN1	ACCTTAAACAGAGAGCCAGCA	GCTCGTTTTCTTTCAGAGTTGC
FAM13A	CCACTACTGCCTCCTCAAGT	CTTCATGCCTTCAAGCCCAG
CEP63	ACAAAATCGAGGGCATGGTG	GAGCATGTGTACGTCCTTCC
ARHGAP20	AGCGCTCCATCTCTTATCCT	GCCATCAATCAGCAGAGTCC
TUBA4A	CGACTCCTTCACCACCTTCT	GGTGGAAGAGCTGTCGGTAT
EFNA5	GATGTGTGTGTTCAGCCAGG	AGGGCAGAAAACATCCAGGT
FOXM1	TTCCCTGCACGACATGTTTG	CTCGGGCAATTGTGGAGAC
SDC2	TGTTGACTAGTGCTGCTCCA	CTTCGGCTGGGTCCATTTTC
FGD2	AAGTGAGGAGAAGCTGGCAT	GATGCACGTCCTCTAGCCTC
ARPC5	AACATGACAGCTGCCCTACA	ACCTTCAAGACAATGCTGCC
YES1	GCAGACTTTGGTTTAGCAAGG	CGACCATACAGTGCAGCTTC
BTRC	GACTGAGAATTGTGTGGCCA	GACTGAGAATTGTGTGGCCA
EPHA4	TGACAACGATGCTGCCTCTA	GGTCACCAGCTCCACATTTC
ATM	TGCGTGGCTAACGGAGAAAA	ATCACTGTCACTGCACTCGG
CDKN1A	GCCTGGACTGTTTTCTCTCG	ATTCAGATGTGGGAGGAG
WIPF1	AACTGCCCAAGATGCCTGTC	ATTTCTCCCAGCCTGCTCTG
EFNB2	AGAATTCAGCCCTAACCTCTGG	GGCCCTCCAAAGACCCATTT
CDKN2C	GATTTGGAAGGACTGCGCTG	GCTCTGGCCGCATCATGAAT
SRGAP2	GTAAAGAAGTCGGCCAGCAG	CCGCCTCCTTTAGTTTGCTC
TUBB	CTGGGACCATGGACTCTGTT	TTCCGTACCACATCCAGGAC
AURKA	GGAATATGCACCACTTGGAACA	TAAGACAGGGCATTTGCCAAT

## Sheet: S2
Antobodies
			Experimental conditions
Name	Code	Manufacturer	ChIP	IF	Western Blot	Cytofluorimetry
Anti β-actin	A1978	Sigma - Aldrich	//	//	1:2000	//
Anti-rabbit IgG-HRP	NA934V	GE healthcare	//	//	1:5000	//
Anti-mouse IgG-HRP	NXA931V	GE healthcare	//	//	1:5000	//
Anti HA	3724S	Cell Signaling	1 µg	1:200	1:1000	//
Normal Rabbit IgG	2729S	Cell Signaling	1 µg	//	//	//
Anti total FAK	610087	BD biosciences	//	//	1:1000	//
Anti E-cadherin	610181	BD biosciences	//	//	1:1000	//
Anti N-cadherin	610920	BD biosciences	//	//	1:500	//
Anti AURKB	3094S	Cell Signaling	//	1:200	1:500	//
Anti Survivin	sc-17779	Santa Cruz	//	1:200	//	//
Anti Borealin	sc-376635	Santa Cruz	//	1:200	//	//
Anti Vimentin	TA312104	Origene	//	//	1:1000	//
Anti EpCam	347198	BD biosciences	//	//	//	10μl
Anti Integrin α5-β5	ab177004	Abcam	//	//	//	1μg
Anti INCENP	sc-376514	Santa Cruz	//	1:200	//	//
Anti-mouse Alexa 555	A21422	Invitrogen	//	1:1000	//	1:300
Anti-rabbit Alexa 594	A11012	Invitrogen	//	1:1000	//	//
Phalloidin Alexa 488	A12379	Invitrogen	//	1:400	//	//

## Sheet: S3
			Cleanup		Filter area		Eccentricity		Metric
		Segment adjustment	Hole Fill	Adjust size	min	max	min	max
8505c	proliferation	1.4	-	-	500	-	-	-	Phase Area Confluence Normalized on T0
	wound healing	1.3	750	-	3500	-	-	-	wound confluence (%)
	invasion	1.3	750	-	1000	-	-	-	wound density (%)
8305c	proliferation	0.5	-	-	300	-	-	-	Phase Area Confluence Normalized on T0
	wound healing	1.3	750	-	3500	-	-	-	wound confluence (%)
	invasion	1.1	750	-	10000	-	-	-	wound density (%)
BCPAP	proliferation	0.9	700	-	500	-	-	-	Phase Area Confluence Normalized on T0
	wound healing	1.2	800	-	2000	-	-	-	wound confluence (%)
	invasion	1.1	750	-	3500	-	-	-	wound density (%)
TPC1	proliferation	1.2	300	-	600	-	-	-	Phase Area Confluence Normalized on T0
	wound healing	1.2	800	-	2000	-	-	-	wound confluence (%)
	invasion	1.1	750	-	3500	-	-	-	wound density (%)

## Sheet: S4
Genes used for Correlation analisys
Epithelial signature	Mesenchyamal signature
zo3	twist1
cldn3	twist2
ocln	zeb1
epcam	zeb2
cdh1	vim
cdh16	ctnnb1
	mmp1
	mmp2
	mmp3
	ncam1
	cdh2
